## Correction

# Correction: Characteristics of Memory B Cells Elicited by a Highly Efficacious HPV Vaccine in Subjects with No Pre-existing Immunity

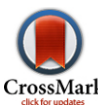

## The PLOS Pathogens Staff

Table S1 in the published article is missing three primers. Please view the corrected version of Table S1 here for the complete list of primers, with omissions highlighted in yellow.

## Supporting Information

**Table S1. Primers used in this study, including specifications for the amplification PCR (e.g., designation of primer sets, annealing temperatures, etc.).**  
(XLSX)

## Reference

1. Scherer EM, Smith RA, Simonich CA, Niyonzima N, Carter JJ, et al. (2014) Characteristics of Memory B Cells Elicited by a Highly Efficacious HPV Vaccine in Subjects with No Pre-existing Immunity. PLoS Pathog 10(10): e1004461. doi:10.1371/journal.ppat.1004461

**Citation:** The PLOS Pathogens Staff (2014) Correction: Characteristics of Memory B Cells Elicited by a Highly Efficacious HPV Vaccine in Subjects with No Pre-existing Immunity. PLoS Pathog 10(12): e1004612. doi:10.1371/journal.ppat.1004612

**Published:** December 18, 2014

**Copyright:** © 2014 The PLOS Pathogens Staff. This is an open-access article distributed under the terms of the Creative Commons Attribution License, which permits unrestricted use, distribution, and reproduction in any medium, provided the original author and source are credited.
